# Supplementary material for: E-selectin-mediated rapid NLRP3 inflammasome activation regulates S100A8/S100A9 release from neutrophils via transient gasdermin D pore formation
Source: PubMed Central journal article supplement (PMC10681899; doi:10.1038/s41590-023-01656-1), 2023-10-30

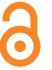

# **E-selectin-mediated rapid NLRP3 inflammasome activation regulates S100A8/S100A9 release from neutrophils via transient gasdermin D pore formation**

In the format provided by the authors and unedited

## **Table of contents**

- **Supplementary Video 1**
- **Supplementary Video 2**
- **Supplementary Data (uncropped Western Blots)**
- **Reporting Summary**

uncropped western blots:

Figure 2a

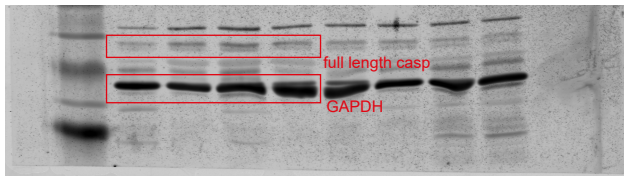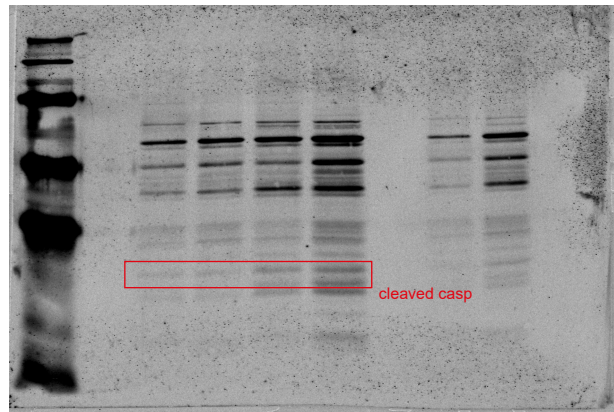

Figure 2b

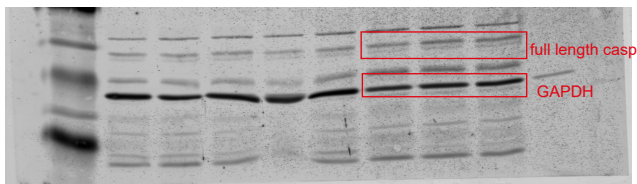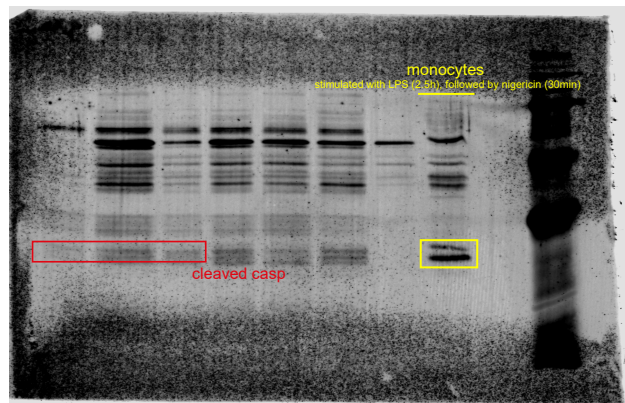

Figure 2f/Supplementary Figure 3a

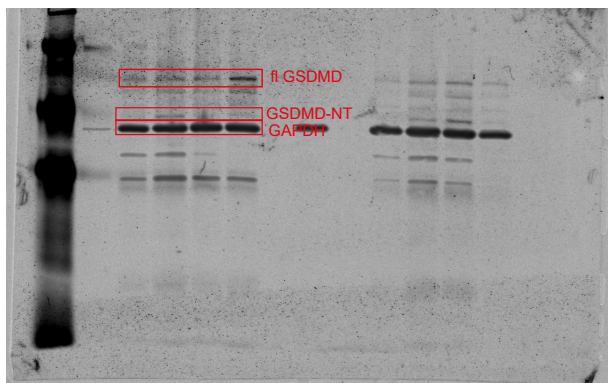

uncropped western blots:

Figure 3a

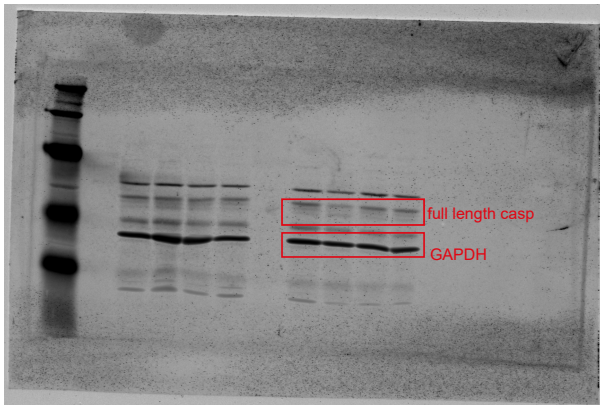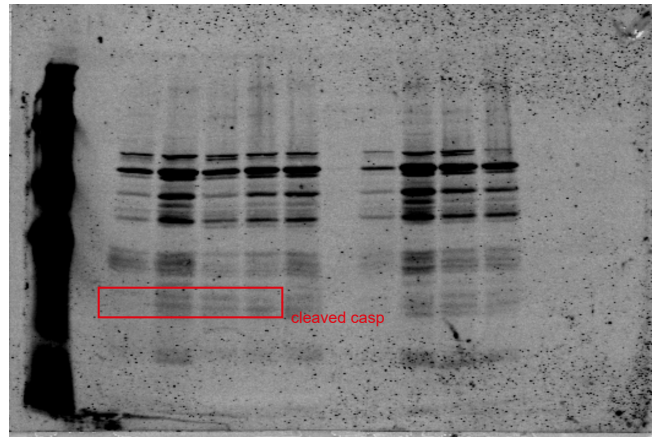

Figure 3b

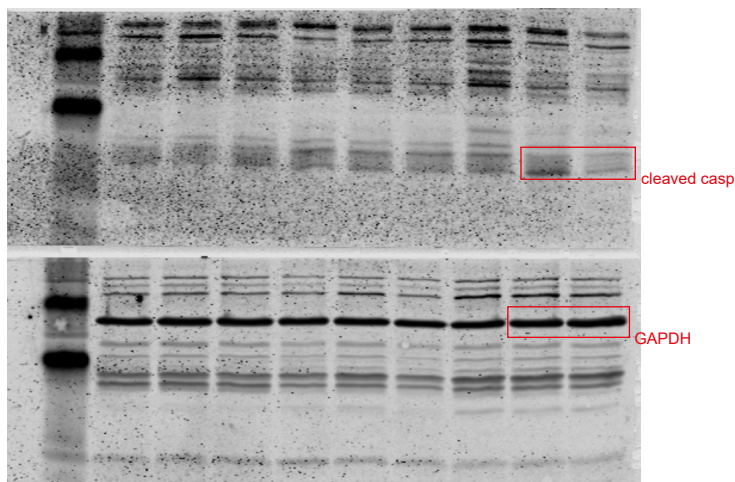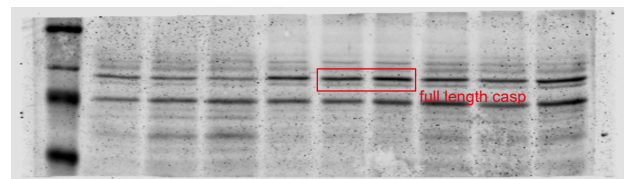

Figure 4a

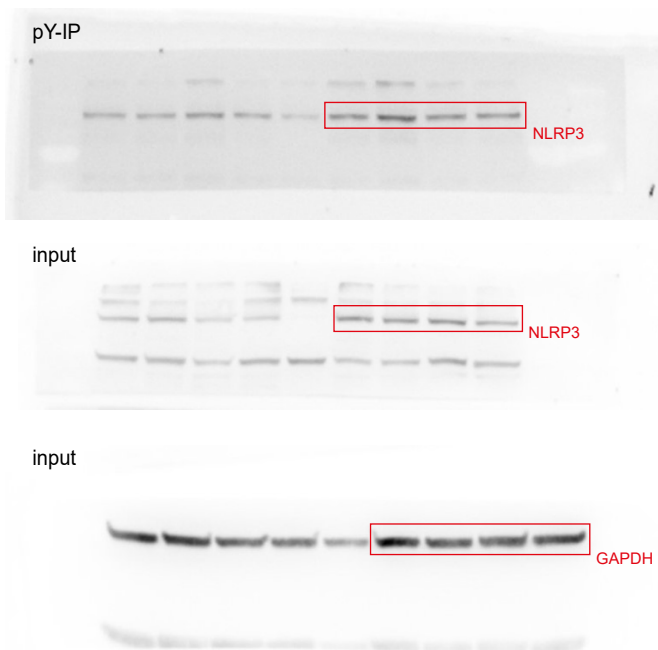

Figure 4c

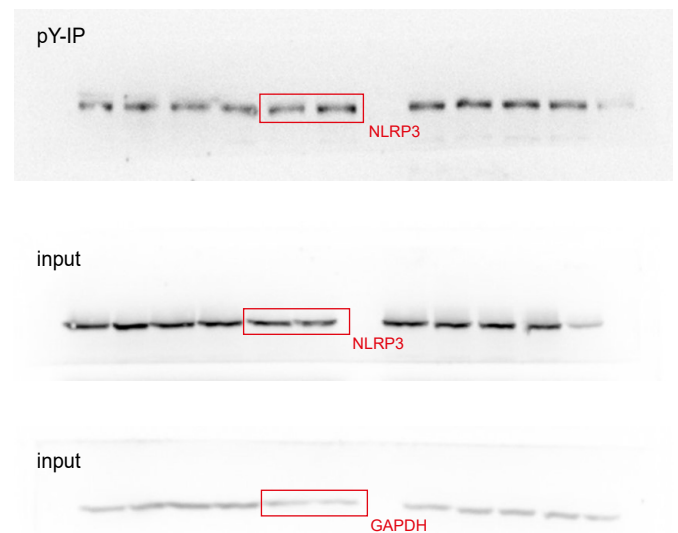



uncropped western blots:

Figure 4c and 4f

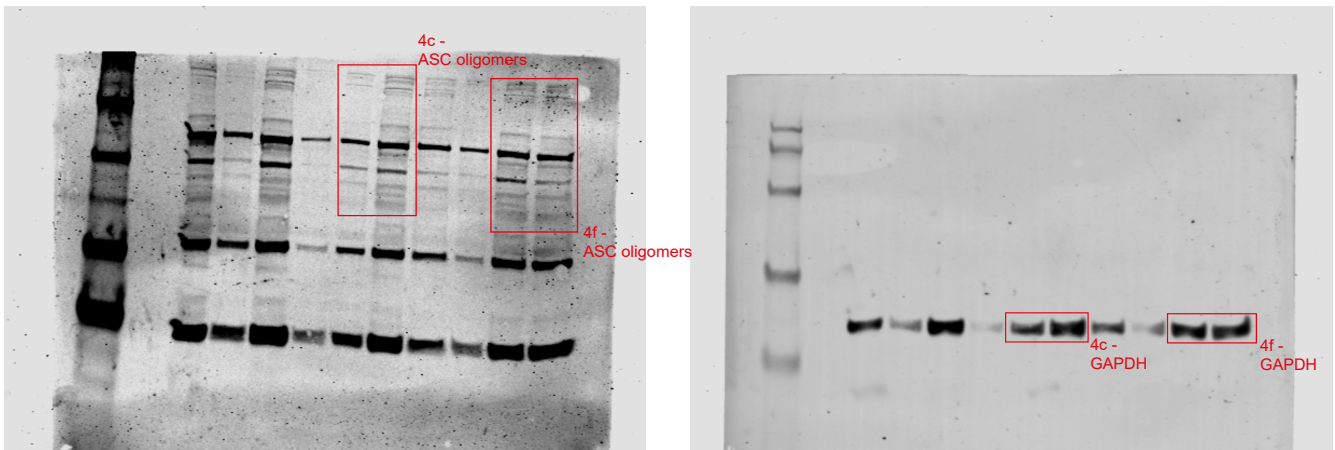

Supplementary Figure 1h

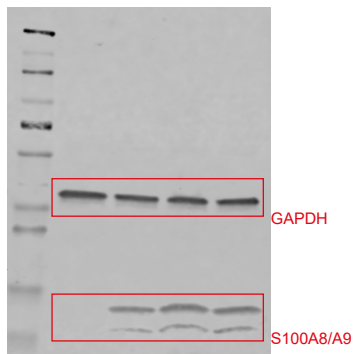

Supplementary Figure 2a

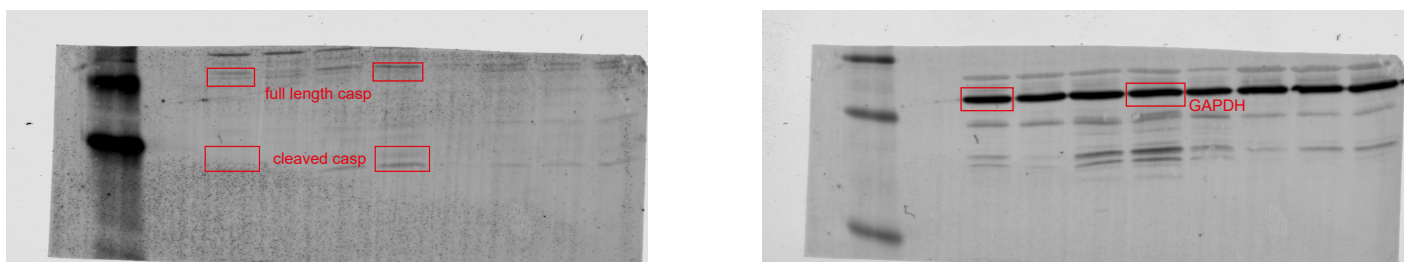

Supplement: 41590_2023_1656_MOESM1_ESM.pdf [file 41590_2023_1656_MOESM1_ESM.pdf]
